# Supplementary material for: Validation of Selected Head and Neck Cancer Prognostic Markers from the Pathology Atlas in an Oral Tongue Cancer Cohort
Source: MDPI journal article supplement (doi:10.3390/cancers13102387), 2021-05-14
Supplement: s1 [file s1]

# **Validation of Selected Head and Neck Cancer Prognostic Markers from the Pathology Atlas in an Oral Tongue Cancer Cohort**

**Anna Maria Wirsing<sup>1</sup>, Inger-Heidi Bjerkli<sup>1,2</sup>, Sonja Eriksson Steigen<sup>1,3</sup>, Oddveig Rikardsen<sup>1,2</sup>, Synnøve Norvoll Magnussen<sup>1</sup>, Beate Hegge<sup>1</sup>, Marit Seppola<sup>1</sup>, Lars Uhlin-Hansen<sup>1,3</sup> and Elin Hadler-Olsen<sup>1,4,\*</sup>**

<sup>1</sup> Department of Medical Biology, Faculty of Health Sciences, UiT The Arctic University of Norway, 9037 Tromsø, Norway; anna.wirsing@uit.no (A.M.W.); Inger-heidi.bjerkli@unn.no (I.-H.B.); sonja.eriksson.steigen@unn.no (S.E.S.); oddveig.rikardsen@unn.no (O.R.); synnove.magnussen@uit.no (S.N.M.); beate.hegge@uit.no (B.H.); Marit.seppola@uit.no (M.S.); Lars.uhlin-hansen@uit.no (L.U.-H.)

<sup>2</sup> Department of Otorhinolaryngology, University Hospital of North Norway, 9038 Tromsø, Norway

<sup>3</sup> Department of Clinical Pathology, University Hospital of North Norway, 9038 Tromsø, Norway

<sup>4</sup> The Public Dental Health Service Competence Centre of Northern Norway, 9019 Tromsø, Norway

\* Correspondence: elin.hadler-olsen@uit.no; Tel.: +47-48-06-72-49

## Supplementary figures

### CALML5

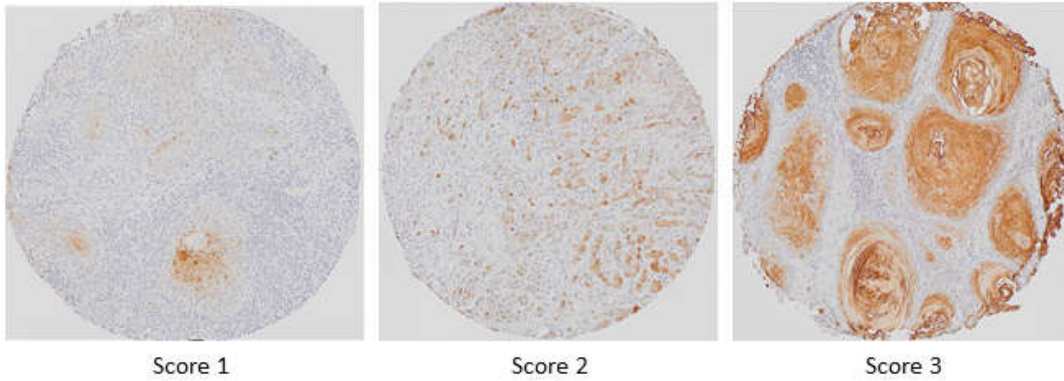

### CD59

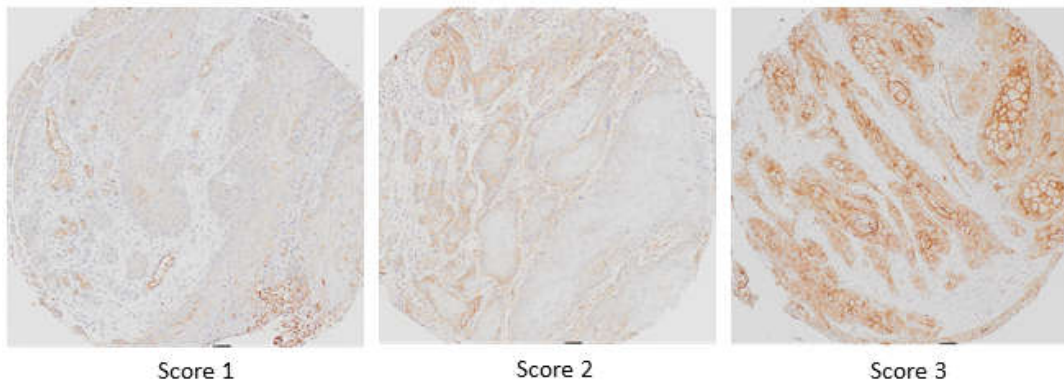

### LIMA1

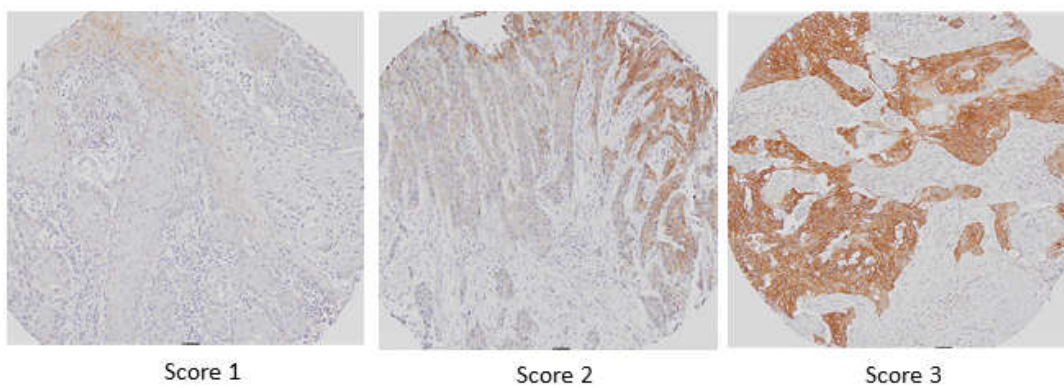

**Figure S1.** Representative immunohistochemical staining and scoring for CALML5, CD59 and LIMA1. Scores were assigned based on proportion of positively stained tumour cells: no staining (0), positive staining in less than 25% of the tumour cells (1), positive staining in 25-50 % of the tumour cells (2) or staining in > 50% of the tumour cells (3).

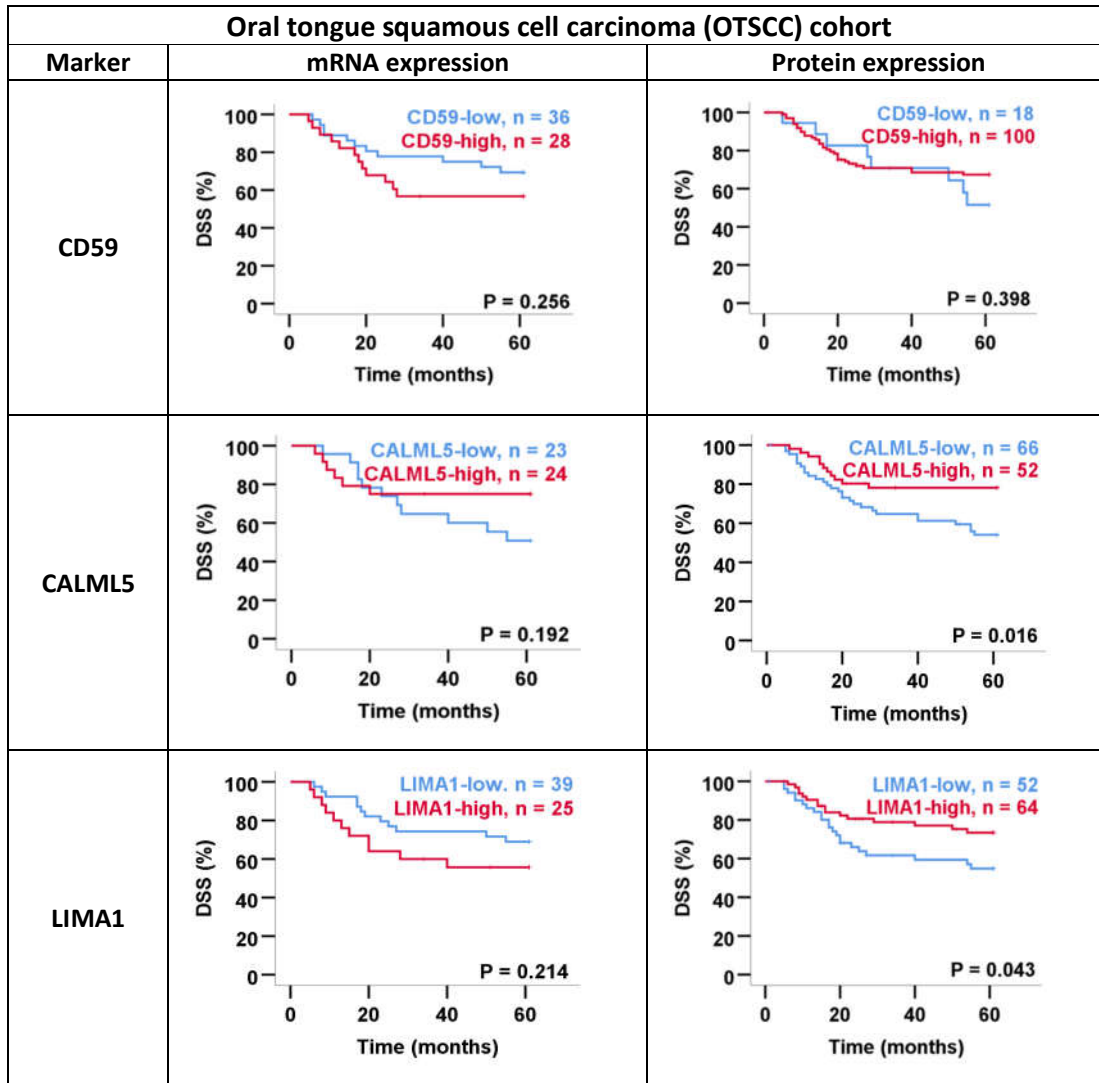

**Figure S2.** Kaplan-Meier curves for 5-year disease-specific survival. Target protein and mRNA expression in the oral tongue squamous cell carcinoma cohort using best separation cutoff (median for all except CD59 protein, which was 25%), and their association with 5-year disease-specific survival (DSS) in Kaplan-Meier analysis. The p-value was calculated using the log-rank test, with the significance level set to 0.05.

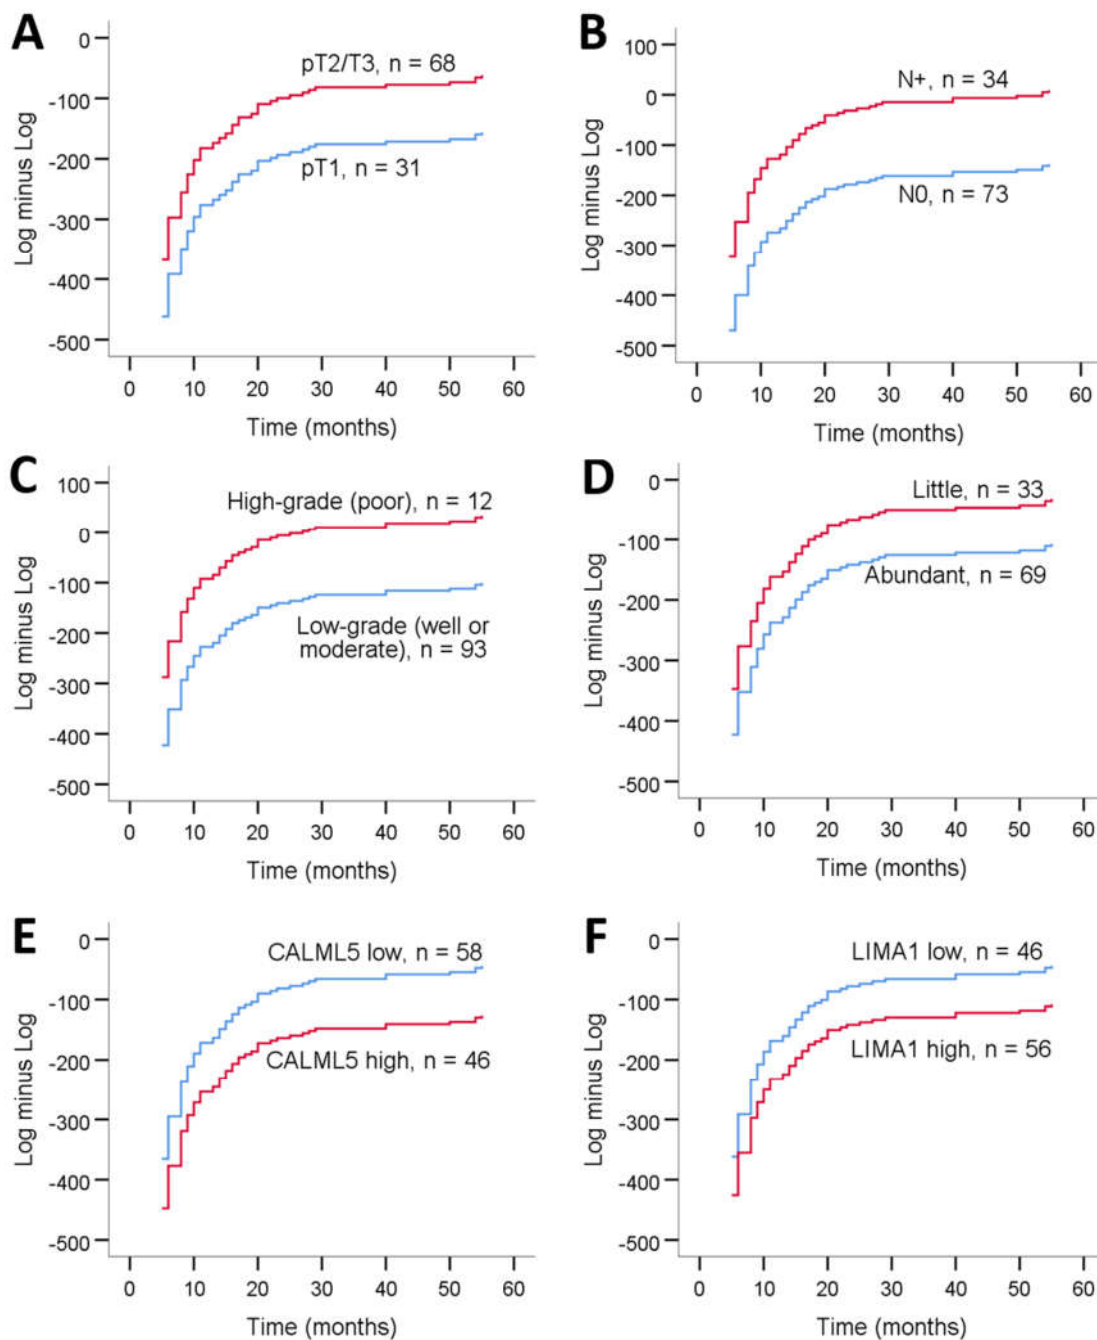

**Figure S3.** Log minus log plots for proportional hazards checking. A) pT status, B) N status, C) differentiation of whole tumour, D) lymphocyte infiltration, E) CALML5 protein expression, F) LIMA1 protein expression.

### Supplementary tables

**Table S1.** Reasoning behind selection of prognostic markers for Head and neck cancer in the Pathology Atlas to validate in a cohort of oral tongue cancer.

| Marker | Associated with tumour cells | HPA-validated antibody available | Expression pattern IHC  | Conclusion |
|--------|------------------------------|----------------------------------|-------------------------|------------|
| DKK1   | Unknown                      | No                               | No information          | Excluded   |
| LIMA1  | Yes                          | Yes                              | Intracellular           | Included   |
| CD59   | Yes                          | Yes                              | Intracellular, membrane | Included   |
| GZMM   | No                           | Yes                              | Intracellular, secreted | Excluded   |
| CCR7   | No                           | Yes                              | Membrane                | Excluded   |
| CALML5 | Yes                          | Yes                              | Intracellular           | Included   |
